# Supplementary material for: The impact of removing financial incentives and/or audit and feedback on chlamydia testing in general practice: A cluster randomised controlled trial (ACCEPt-able)
Source: PLOS journal article supplement (doi:10.1371/journal.pmed.1003858), 2022-01-04
Supplement: S2 (10.1371/journal.pmed.1003858.s002) [file journal.pmed.1003858.s002]

S1 Figure: Annual chlamydia testing rates for ACCEPt into ACCEPt-able<sup>a</sup>

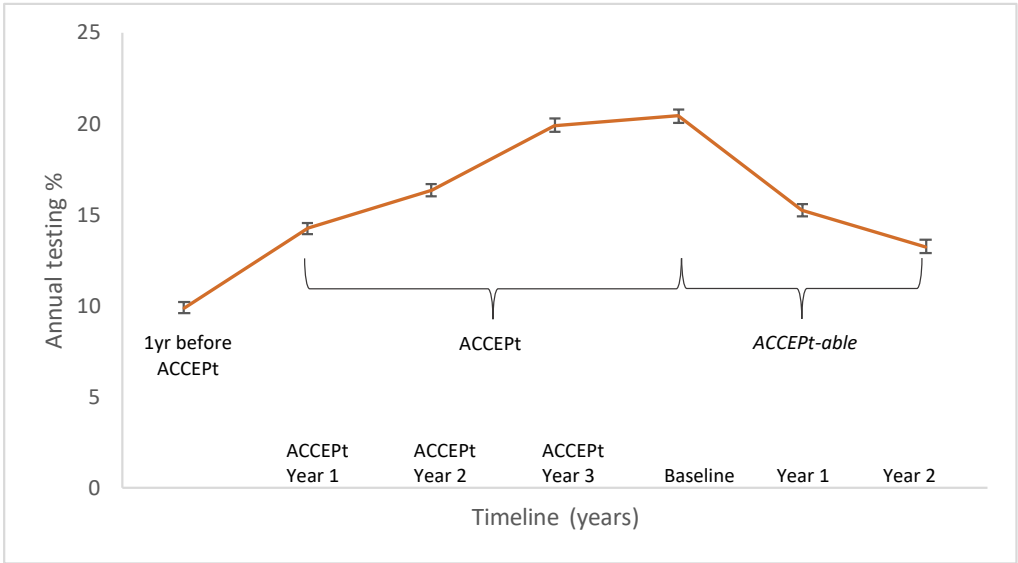

<sup>a</sup>Error bars correspond to 95% confidence intervals
